# Supplementary material
Source: PubMed Central journal article supplement (PMC454164)
Supplement: pnas_101_27_10060__2.pdf [file pnas_101_27_10060__2.pdf]

Human red-cell suspension in vitro

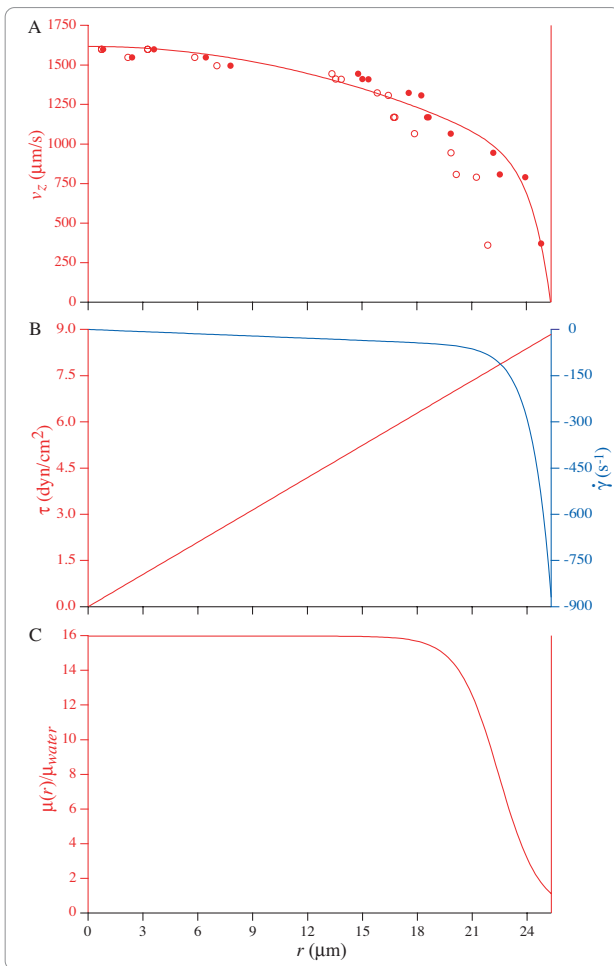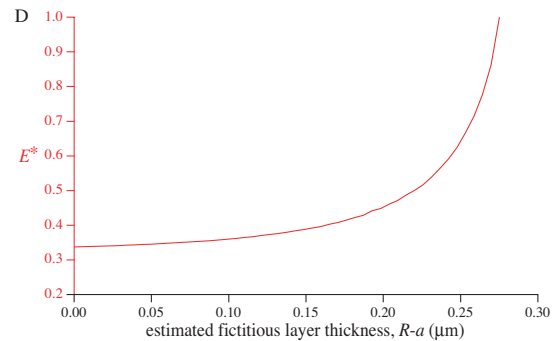

**E**

| $D = 50.7 \mu\text{m}$<br>$H_D = 54.8$ | $-\frac{dp}{dz}$ ( $\text{dyn/cm}^3$ ) |                | $\eta_{rel}$ |               | $\frac{\dot{\gamma}(R)}{\dot{\gamma}_P(R)}$<br>6.8 |
|----------------------------------------|----------------------------------------|----------------|--------------|---------------|----------------------------------------------------|
|                                        | <i>meas.</i>                           | <i>pred.</i>   | <i>emp.</i>  | <i>pred.</i>  |                                                    |
|                                        | 7,848                                  | 6,985<br>(11%) | 2.53         | 3.14<br>(24%) |                                                    |
