# Supplementary material
Source: PubMed Central journal article supplement (PMC454164)
Supplement: pnas_101_27_10060__3.pdf [file pnas_101_27_10060__3.pdf]

Human red-cell suspension in vitro

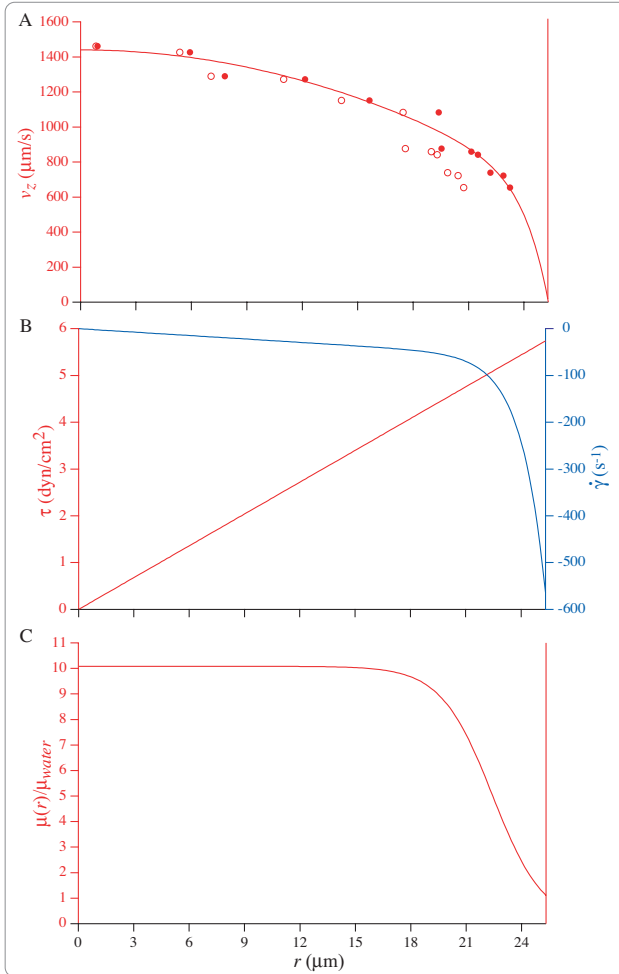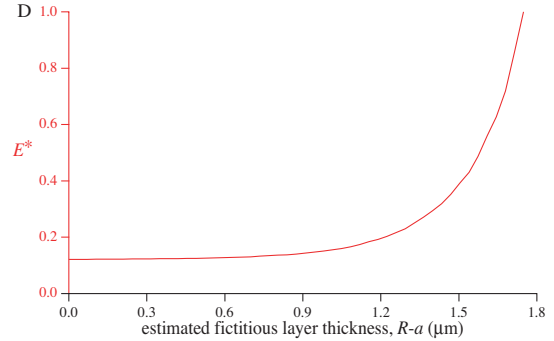

**E**

| $D = 50.7 \mu\text{m}$<br>$H_D = 54.8$ | $-\frac{dp}{dz}$ ( $\text{dyn/cm}^3$ ) |                | $\eta_{rel}$ |              | $\frac{\dot{\gamma}(R)}{\dot{\gamma}_P(R)}$ |
|----------------------------------------|----------------------------------------|----------------|--------------|--------------|---------------------------------------------|
|                                        | <i>meas.</i>                           | <i>pred.</i>   | <i>emp.</i>  | <i>pred.</i> |                                             |
|                                        | 6,779                                  | 4,531<br>(33%) | 2.53         | 2.42<br>(4%) | 5.0                                         |
