# Supplementary material
Source: PubMed Central journal article supplement (PMC454164)
Supplement: pnas_101_27_10060__4.pdf [file pnas_101_27_10060__4.pdf]

Human red-cell suspension in vitro

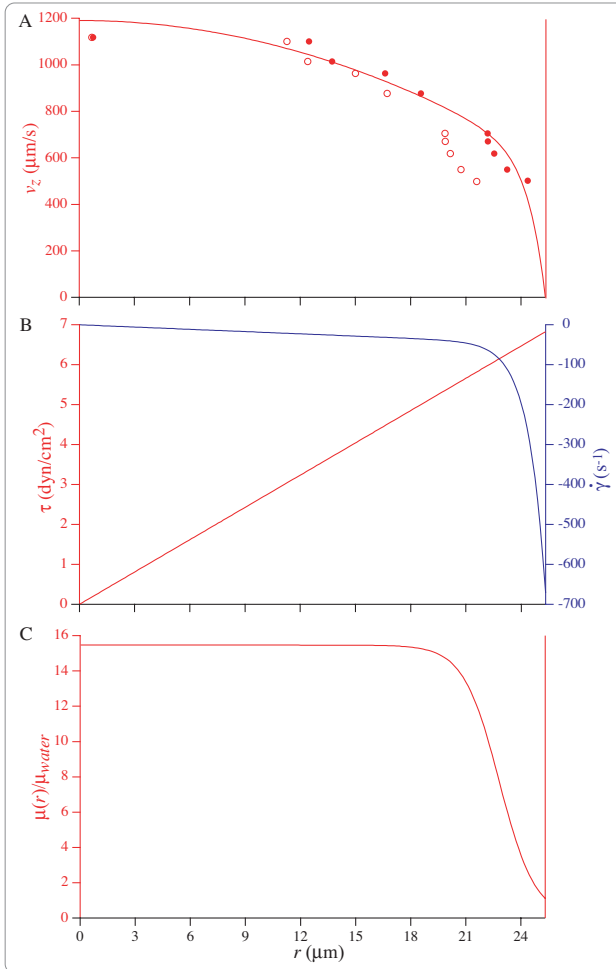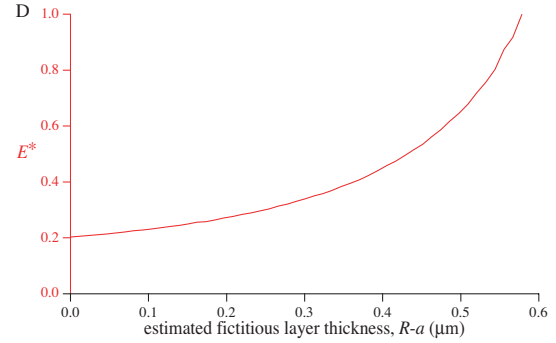

**E**

|                        | $-\frac{dp}{dz}$ ( $\text{dyn/cm}^3$ ) |                 | $\eta_{rel}$ |               | $\frac{\dot{\gamma}(R)}{\dot{\gamma}_P(R)}$ |
|------------------------|----------------------------------------|-----------------|--------------|---------------|---------------------------------------------|
|                        | <i>meas.</i>                           | <i>pred.</i>    | <i>emp.</i>  | <i>pred.</i>  |                                             |
| $D = 50.7 \mu\text{m}$ |                                        |                 |              |               | 7.1                                         |
| $H_D = 54.8$           | 5,347                                  | 5,392<br>(0.8%) | 2.53         | 3.35<br>(32%) |                                             |
