# Supplementary material
Source: PubMed Central journal article supplement (PMC454164)
Supplement: pnas_101_27_10060__7.pdf [file pnas_101_27_10060__7.pdf]

Human red-cell suspension in vitro

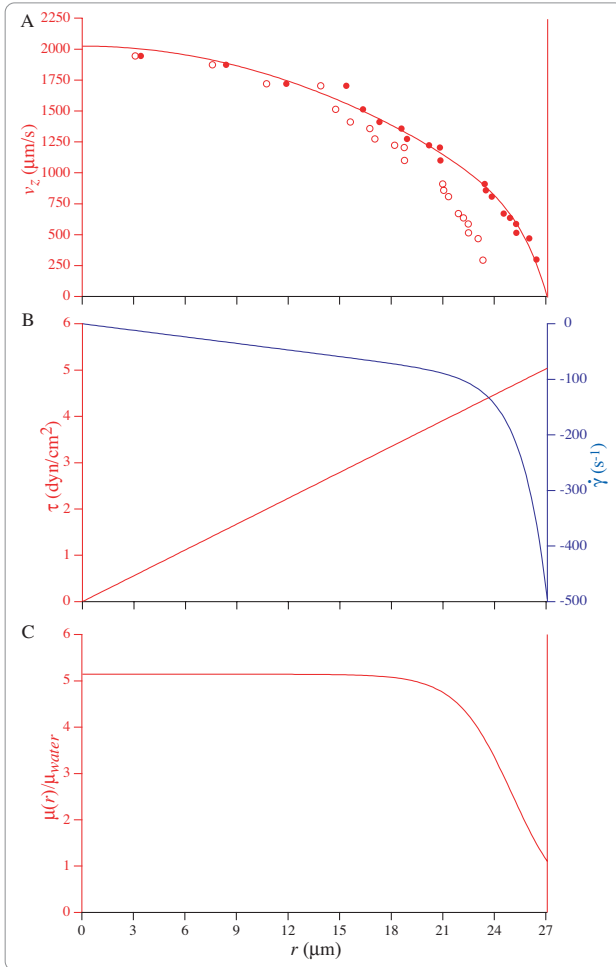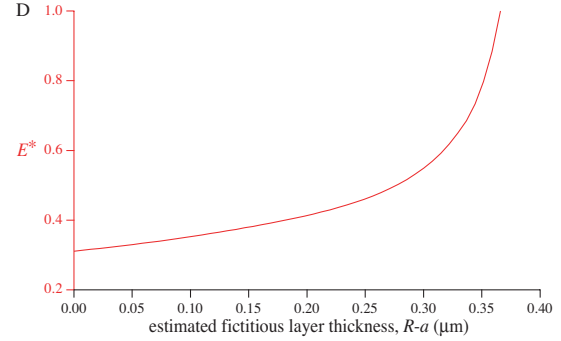

**E**

| $D = 54.2 \mu\text{m}$<br>$H_D = 33.5$ | $-\frac{dp}{dz}$ ( $\text{dyn/cm}^3$ ) |                | $\eta_{rel}$ |               | $\frac{\dot{\gamma}(R)}{\dot{\gamma}_P(R)}$ |
|----------------------------------------|----------------------------------------|----------------|--------------|---------------|---------------------------------------------|
|                                        | <i>meas.</i>                           | <i>pred.</i>   | <i>emp.</i>  | <i>pred.</i>  |                                             |
|                                        | 3,732                                  | 4,571<br>(22%) | 1.68         | 1.84<br>(10%) | 3.3                                         |
