# Supplementary material
Source: PubMed Central journal article supplement (PMC454164)
Supplement: pnas_101_27_10060__9.pdf [file pnas_101_27_10060__9.pdf]

Human red-cell suspension in vitro

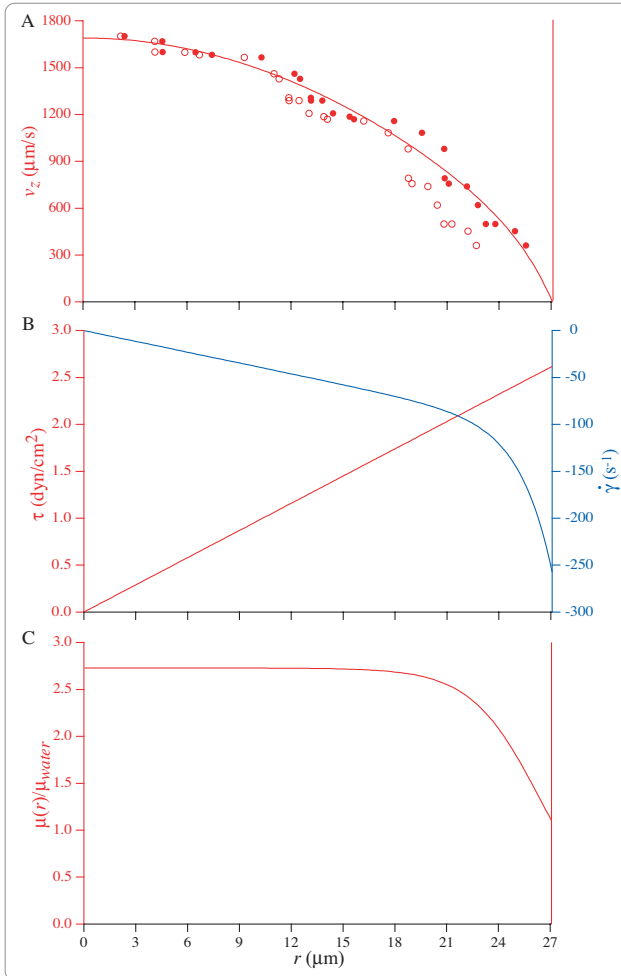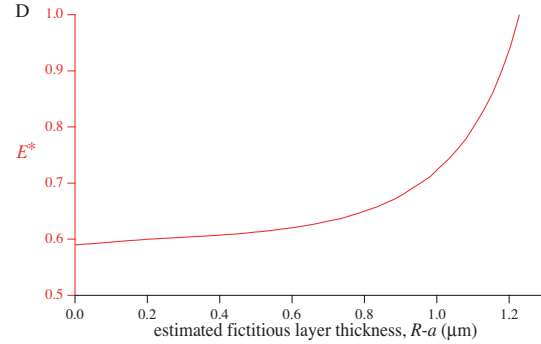

**E**

| $D = 54.2 \mu\text{m}$<br>$H_D = 17.6$ | $-\frac{dp}{dz}$ ( $\text{dyn/cm}^3$ ) |                | $\eta_{rel}$ |              | $\frac{\dot{\gamma}(R)}{\dot{\gamma}_P(R)}$ |
|----------------------------------------|----------------------------------------|----------------|--------------|--------------|---------------------------------------------|
|                                        | <i>meas.</i>                           | <i>pred.</i>   | <i>emp.</i>  | <i>pred.</i> |                                             |
|                                        | 1,873                                  | 2,374<br>(27%) | 1.30         | 1.25<br>(4%) | 2.1                                         |
