# Supplementary material
Source: PubMed Central journal article supplement (PMC454164)
Supplement: pnas_101_27_10060__15.pdf [file pnas_101_27_10060__15.pdf]

Mouse whole blood in vivo

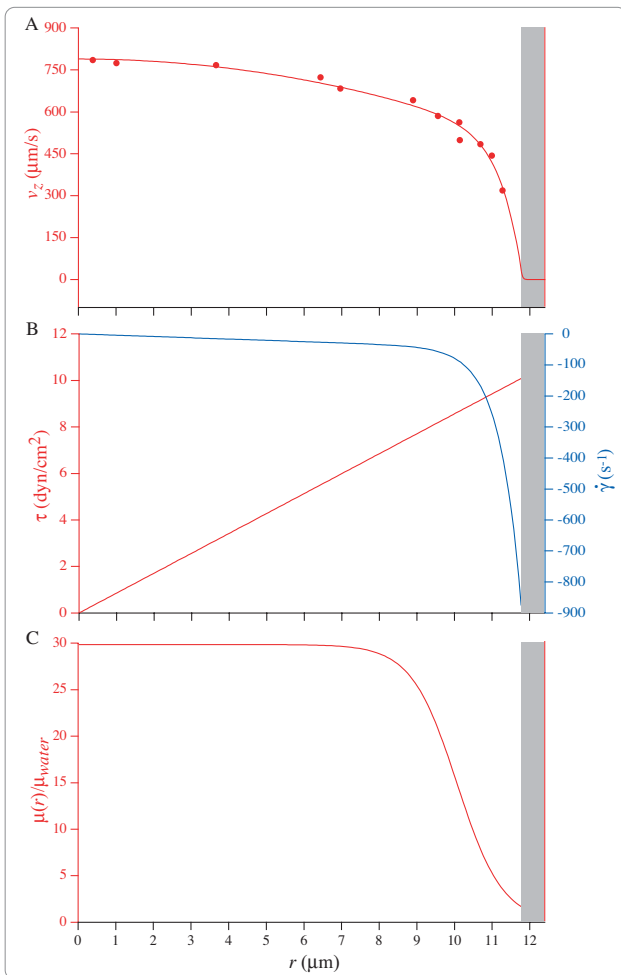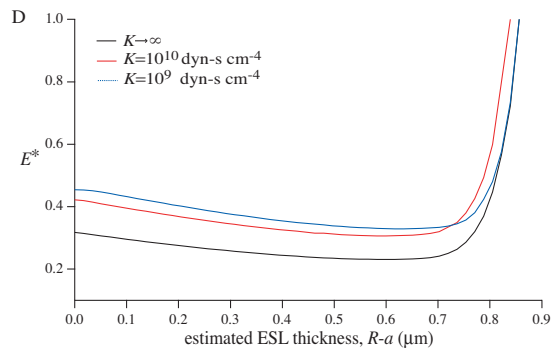

**E**

| $D$ ( $\mu\text{m}$ ) | $R - a$ ( $\mu\text{m}$ ) | $-\frac{dp}{dz}$ ( $\text{dyn/cm}^3$ ) | $\eta_{rel}$ | $\frac{\dot{\gamma}(R)}{\dot{\gamma}_P(R)}$ |
|-----------------------|---------------------------|----------------------------------------|--------------|---------------------------------------------|
| 24.8                  | 0.63                      | 16,254                                 | 4.97         | 6.9                                         |
