# Supplementary material
Source: PubMed Central journal article supplement (PMC454164)
Supplement: pnas_101_27_10060__19.pdf [file pnas_101_27_10060__19.pdf]

Mouse whole blood in vivo

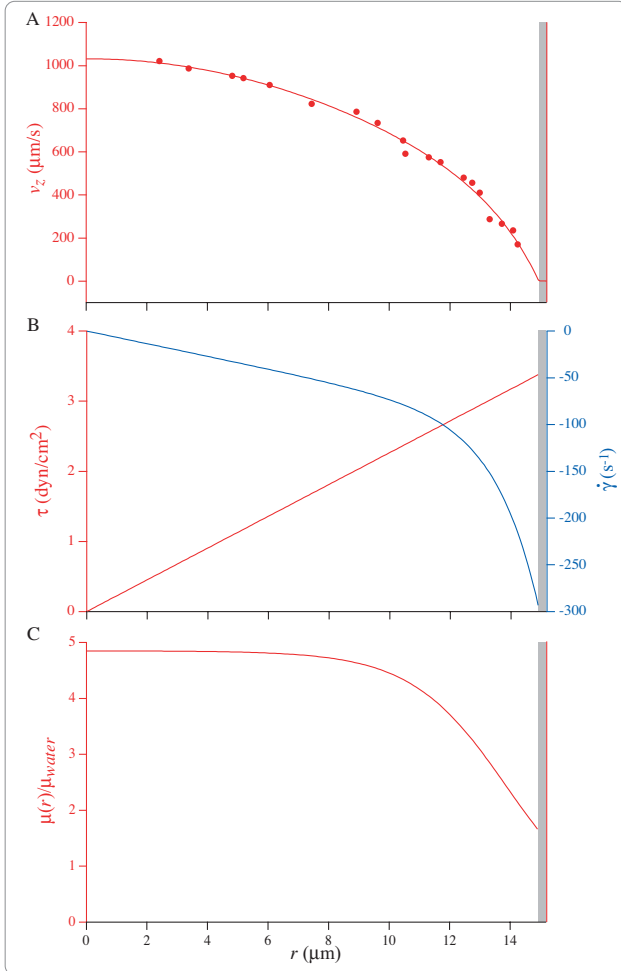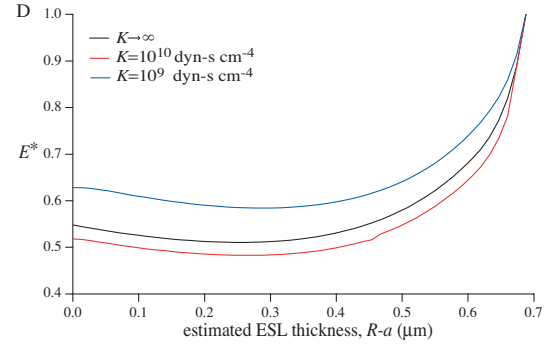

E

| $D$ ( $\mu\text{m}$ ) | $R - a$ ( $\mu\text{m}$ ) | $-\frac{dp}{dz}$ ( $\text{dyn/cm}^3$ ) | $\eta_{rel}$ | $\frac{\dot{\gamma}(R)}{\dot{\gamma}_P(R)}$ |
|-----------------------|---------------------------|----------------------------------------|--------------|---------------------------------------------|
| 30.4                  | 0.29                      | 4,448                                  | 1.82         | 2.2                                         |
