# Supplementary material
Source: PubMed Central journal article supplement (PMC454164)
Supplement: pnas_101_27_10060__26.pdf [file pnas_101_27_10060__26.pdf]

Mouse whole blood in vivo before hemodilution

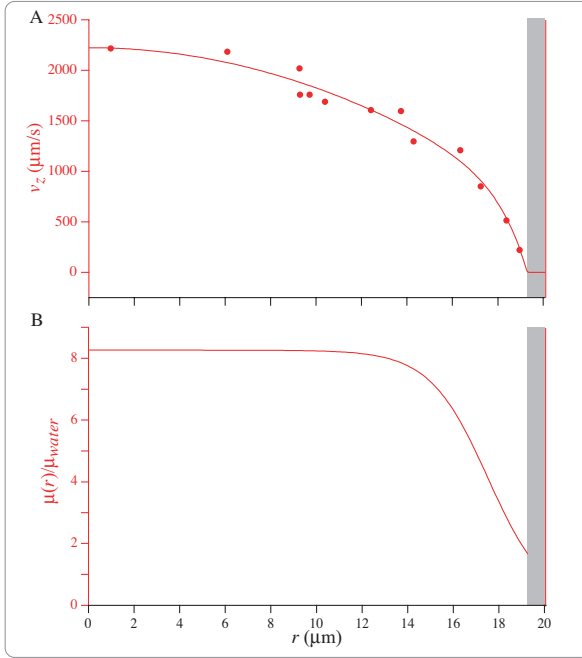

Mouse whole blood in vivo after hemodilution

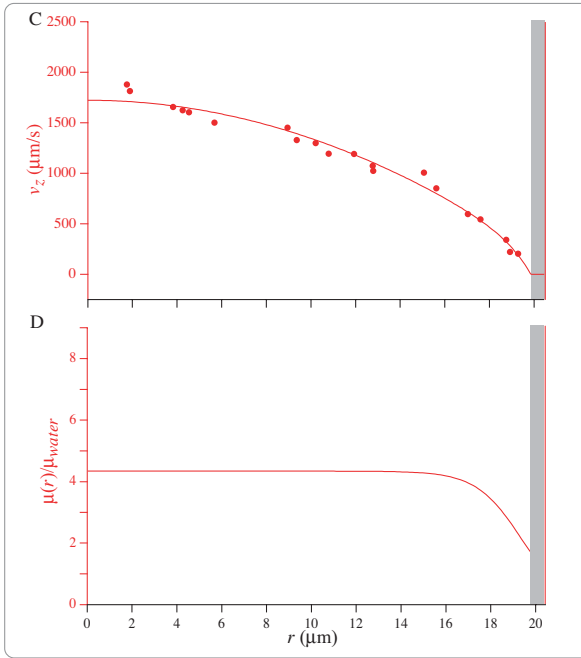

E

| % decrease in $\mu_T$<br>$(\frac{1}{A} \iint_A \frac{\mu(r)}{\mu_a} dA)$ | % decrease in $\mu_D$<br>$(\frac{1}{Q} \iint_A \frac{\mu(r)}{\mu_a} v_z(r) dA)$ | % decrease<br>in $\eta_{rel}$ | % decrease<br>in $H_{sys}$ |
|--------------------------------------------------------------------------|---------------------------------------------------------------------------------|-------------------------------|----------------------------|
| 39.4                                                                     | 43.5                                                                            | 26.0                          | 34.6                       |

F

Parameters before hemodilution

| $D$ (μm) | $R - a$ (μm) | $-\frac{dp}{dz}$ (dyn/cm <sup>3</sup> ) | $\eta_{rel}$ | $\frac{\dot{\gamma}(R)}{\dot{\gamma}_P(R)}$ |
|----------|--------------|-----------------------------------------|--------------|---------------------------------------------|
| 40.2     | 0.82         | 8,724                                   | 3.08         | 3.4                                         |

G

Parameters after hemodilution

| $D$ (μm) | $R - a$ (μm) | $-\frac{dp}{dz}$ (dyn/cm <sup>3</sup> ) | $\eta_{rel}$ | $\frac{\dot{\gamma}(R)}{\dot{\gamma}_P(R)}$ |
|----------|--------------|-----------------------------------------|--------------|---------------------------------------------|
| 40.9     | 0.64         | 4,386                                   | 2.28         | 2.3                                         |
