# Supplementary material
Source: PubMed Central journal article supplement (PMC454164)
Supplement: pnas_101_27_10060__30.pdf [file pnas_101_27_10060__30.pdf]

**Table 2. Percentage of decrease in  $\mu_T^*$ ,  $\mu_D^*$ , and  $\eta_{\text{rel}}$  in five cremaster-muscle venules (Figs. 27–31) after systemic hemodilution in three mice**

| Figure         | % decrease in $\mu_T^*$<br>$\left(\frac{1}{A} \iint_A \frac{\mu(r)}{\mu_a} dA\right)$ | % decrease in $\mu_D^*$<br>$\left(\frac{1}{Q} \iint_A \frac{\mu(r)}{\mu_a} v_z(r) dA\right)$ | % decrease<br>in $\eta_{\text{rel}}$ | % decrease<br>in $H_{\text{sys}}$ |
|----------------|---------------------------------------------------------------------------------------|----------------------------------------------------------------------------------------------|--------------------------------------|-----------------------------------|
| 27             | 21.0                                                                                  | 22.7                                                                                         | 4.7                                  | 34.4                              |
| 28             | 48.0                                                                                  | 47.2                                                                                         | 42.3                                 | 34.6                              |
| 29             | 39.4                                                                                  | 43.5                                                                                         | 26.0                                 | 34.6                              |
| 30             | 22.2                                                                                  | 27.5                                                                                         | 23.5                                 | 34.4                              |
| 31             | 36.7                                                                                  | 40.6                                                                                         | 29.2                                 | 29.4                              |
| Average        | 33.5                                                                                  | 36.3                                                                                         | 25.1                                 | 33.5                              |
| Standard Error | 5.2                                                                                   | 4.8                                                                                          | 6.1                                  | 1.0                               |

Quantities were calculated based on a hydraulic resistivity of the endothelial surface layer (ESL) of  $K = 10^9$  dyn·s/cm<sup>4</sup>.
