# Supplementary material
Source: PubMed Central journal article supplement (PMC454164)

Saline in vitro

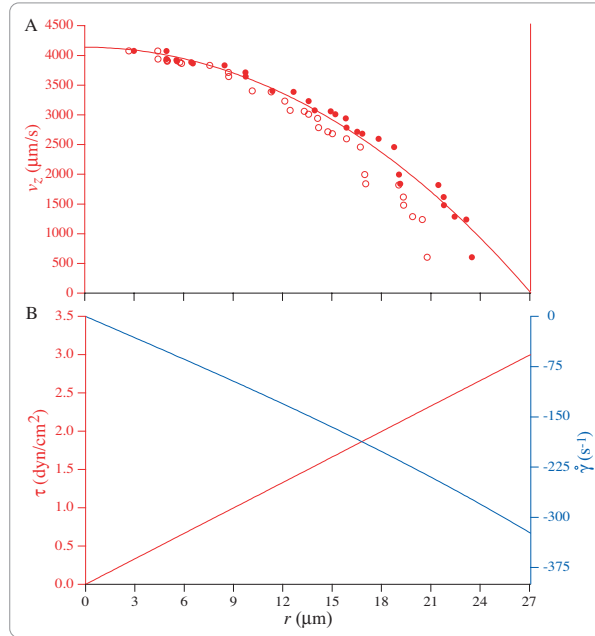

C

| $D$ ( $\mu\text{m}$ ) | $-\frac{dp}{dz}$ ( $\text{dyn/cm}^3$ ) |                 | $\frac{\dot{\gamma}(R)}{\dot{\gamma}_P(R)}$ |
|-----------------------|----------------------------------------|-----------------|---------------------------------------------|
|                       | <i>meas.</i>                           | <i>pred.</i>    |                                             |
| 54.2                  | 2,236                                  | 2,218<br>(0.8%) | 1.06                                        |

Supplement: pnas_101_27_10060__11.pdf [file pnas_101_27_10060__11.pdf]

Mouse whole blood in vivo

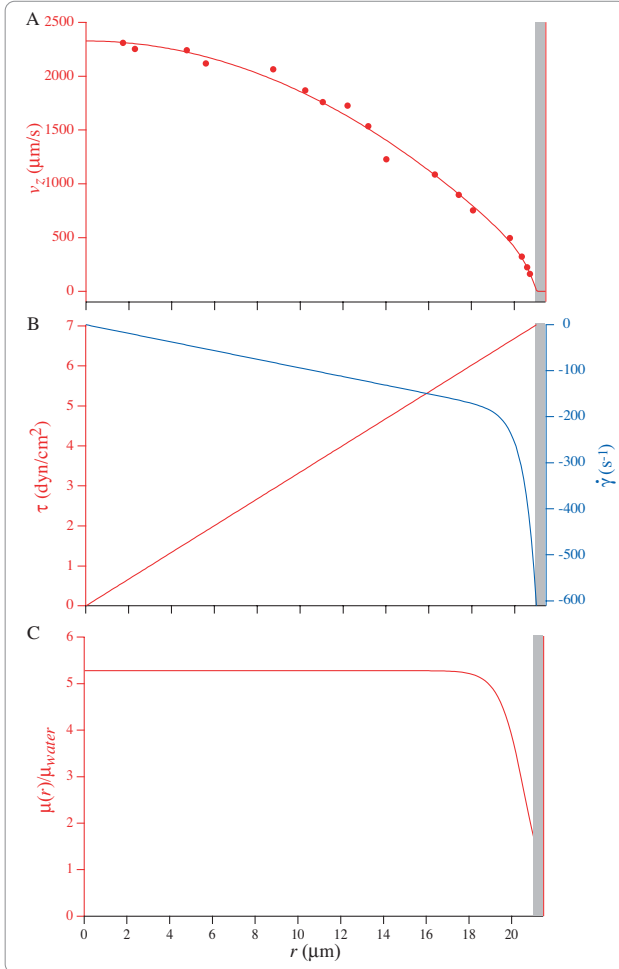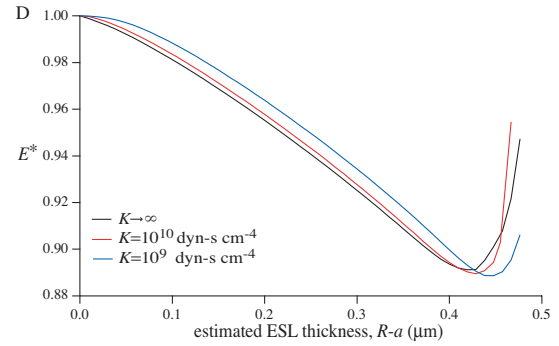

**E**

| $D$ (μm) | $R - a$ (μm) | $-\frac{dp}{dz}$ (dyn/cm <sup>3</sup> ) | $\eta_{rel}$ | $\frac{\dot{\gamma}(R)}{\dot{\gamma}_P(R)}$ |
|----------|--------------|-----------------------------------------|--------------|---------------------------------------------|
| 42.9     | 0.45         | 6,549                                   | 2.57         | 2.8                                         |

Supplement: pnas_101_27_10060__22.pdf [file pnas_101_27_10060__22.pdf]
